# Supplementary material for: CO2 Absorption by Solvents Consisting of TMG Protic Ionic Liquids and Ethylene Glycol: The Influence of Hydrogen Bonds
Source: MDPI journal article supplement (doi:10.3390/atmos15020229), 2024-02-14
Supplement: s1 [file s1]

Supplementary materials

# CO<sub>2</sub> Absorption by Solvents Consisting of TMG Protic Ionic Liquids and Ethylene Glycol: The Influence of Hydrogen Bonds

Bohao Lu, Yixing Zeng, Mingzhe Chen, Shaoze Zhang and Dezhong Yang

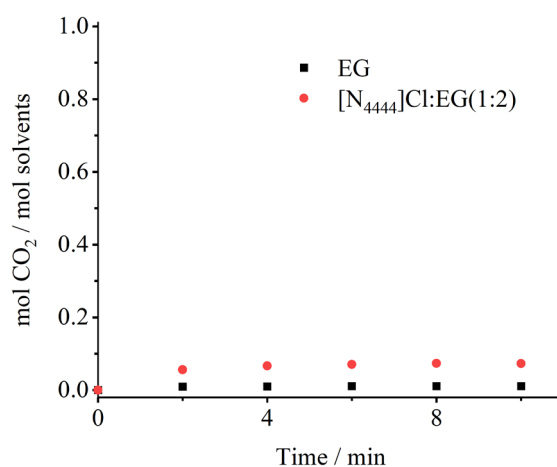

**Figure S1.** CO<sub>2</sub> absorption by EG and [N<sub>4444</sub>]Cl:EG (1:2) at 25 °C and 1.0 atm.

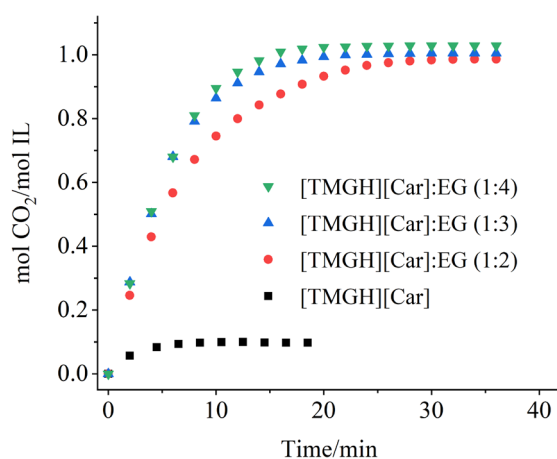

**Figure S2.** CO<sub>2</sub> absorption by [TMGH][Car] and [TMGH][Car]-EG at 25 °C and 1.0 atm.

**Table S1.** Comparison of CO<sub>2</sub> capacities in this work with other IL-based solvents.

| Absorbents                                           | T/ °C | P/bar | Capacity<br>(mol/mol) | References |
|------------------------------------------------------|-------|-------|-----------------------|------------|
| [TMGH][4-F-PhO]:EG (1:2)                             | 25    | 1.0   | 0.97                  | This work  |
| [TMGH][4-F-PhO]:EG (1:3)                             | 25    | 1.0   | 0.98                  | This work  |
| [TMGH][4-F-PhO]:EG (1:4)                             | 25    | 1.0   | 0.98                  | This work  |
| [TMGH][Car]:EG (1:2)                                 | 25    | 1.0   | 0.99                  | This work  |
| [TMGH][Car]:EG (1:3)                                 | 25    | 1.0   | 1.01                  | This work  |
| [TMGH][Car]:EG (1:4)                                 | 25    | 1.0   | 1.03                  | This work  |
| DBN:BmimCl:Im (1:1:2)                                | 25    | 1.0   | 0.97                  | [49]       |
| [N <sub>2222</sub> ][Im]:EG (1:2)                    | 25    | 1.0   | 0.94                  | [50]       |
| [N <sub>2222</sub> ][1,2,4-Triz]:EG (1:2)            | 25    | 1.0   | 0.92                  | [50]       |
| [DBUH][Thy]:EG (1:2)                                 | 25    | 1.0   | 0.91                  | [51]       |
| [N <sub>2222</sub> ][Car]:EG (1:2)                   | 25    | 1.0   | 0.87                  | [52]       |
| [N <sub>2222</sub> ][Car]:4-CH <sub>3</sub> Im (1:2) | 25    | 1.0   | 0.88                  | [52]       |
| [DBUH][MLU]:EG (1:1)                                 | 40    | 1.0   | 0.90                  | [53]       |
| [EMIM][2-Npyr]:EG (1:2)                              | 25    | 1.0   | 0.85                  | [39]       |
| [MEA][Im]:EG (1:1)                                   | 25    | 1.0   | 0.62                  | [28]       |
| [Ch][PhO]: EG (1:2)                                  | 25    | 1.0   | 1.00                  | [54]       |
| [Ch][BP]: EG (1:2)                                   | 25    | 1.0   | 0.89                  | [54]       |
| [Ch][1,2,4-Triz]: EG (1:2)                           | 25    | 1.0   | 0.75                  | [54]       |
| [Ch][Pro]: EG (1:2)                                  | 25    | 1.0   | 0.72                  | [55]       |
| [Ch][Gly]: EG (1:2)                                  | 25    | 1.0   | 0.51                  | [55]       |
| [Ch][OAc]: EG (1:2)                                  | 25    | 1.0   | 0.20                  | [54]       |
| DBN-DMLU (2:1)                                       | 45    | 1.0   | 0.36                  | [56]       |
| [P <sub>66614</sub> ][4-Me-PhO]                      | 30    | 1.0   | 0.91                  | [17]       |
| [P <sub>66614</sub> ][PhO]                           | 30    | 1.0   | 0.85                  | [17]       |
| [P <sub>66614</sub> ][1,2,4-Triz]                    | 23    | 1.0   | 0.95                  | [14]       |
| [P <sub>66614</sub> ][MN]                            | 25    | 1.0   | 0.84                  | [10]       |
| [P <sub>4442</sub> ][MN]                             | 25    | 1.0   | 0.86                  | [10]       |
| [P <sub>66614</sub> ][MMN]                           | 25    | 1.0   | 0.35                  | [10]       |
| [DMAPAH][Im]                                         | 22    | 1.0   | 0.81                  | [25]       |
| [DMEDAH][Im]                                         | 22    | 1.0   | 0.77                  | [25]       |
| [Emim][1,2,4-Triz]                                   | 30    | 1.0   | 0.65                  | [57]       |
| [N <sub>4442</sub> ][2-Op]                           | 30    | 1.0   | 1.24                  | [58]       |
| [Bmim][2-Op]                                         | 30    | 1.0   | 1.02                  | [58]       |

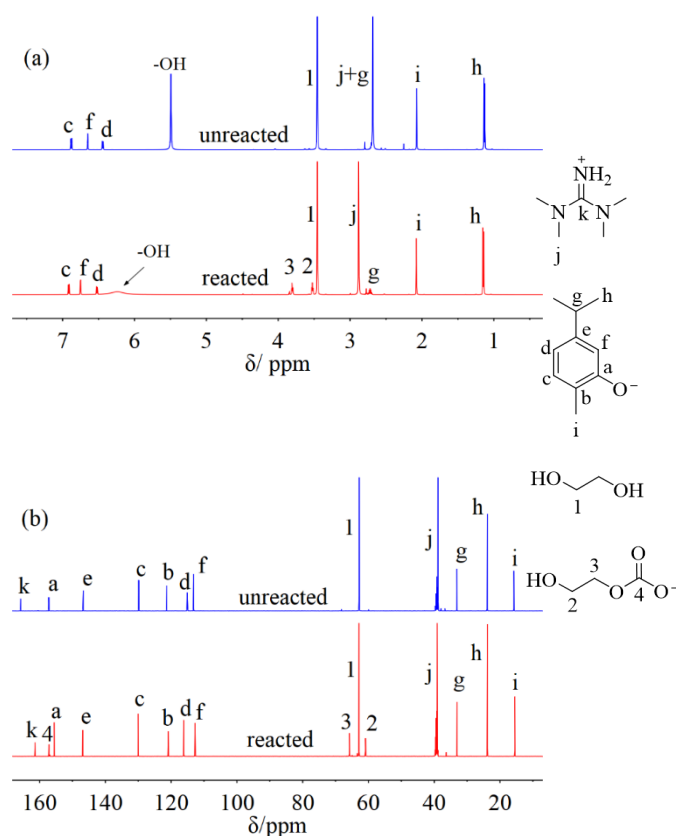

**Figure S3.** The  $^1\text{H}$  (a) and  $^{13}\text{C}$  (b) NMR spectra of [TMGH][Car]:EG (1:3) before and after absorption.

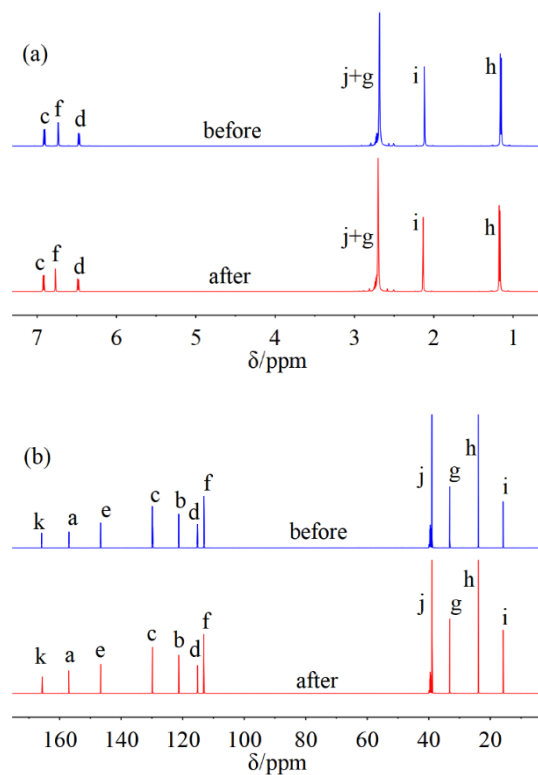

**Figure S4.** The  $^1\text{H}$  (a) and  $^{13}\text{C}$  (b) NMR spectra of [TMGH][Car] before and after absorption.

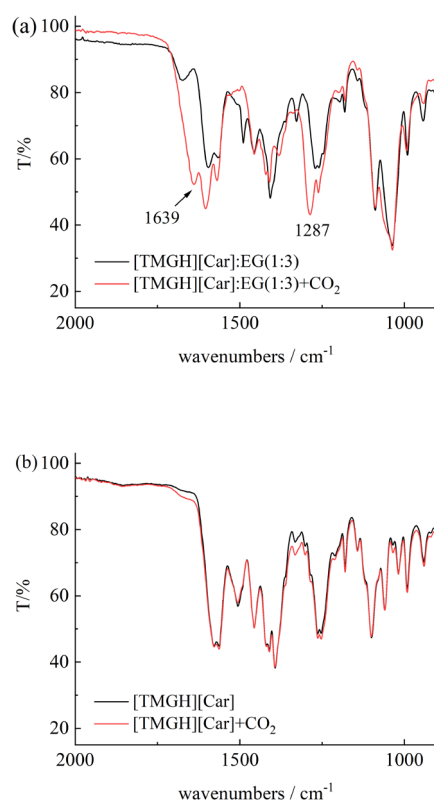

**Figure S5.** The FTIR spectra of [TMGH][Car]:EG (1:3) (a) and [TMGH][Car] (b) before and after absorption.

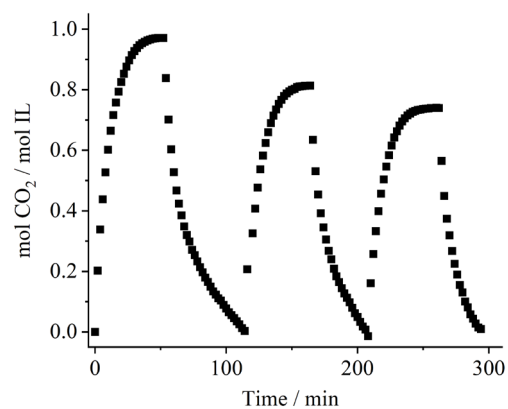

**Figure S6.** The absorption-desorption cycles of [TMGH][4-F-PhO]:EG (1:2): Absorption, 20 °C; Desorption, 70°C.

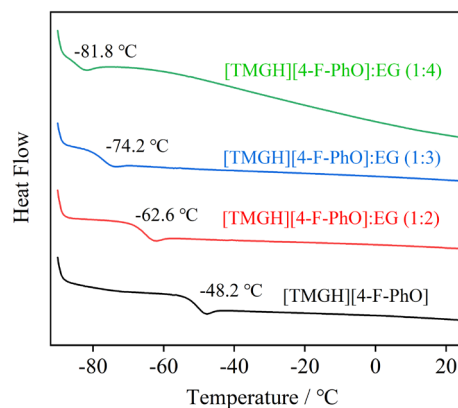

**Figure S7.** The DSC curves of [TMGH][4-F-PhO] -EG and [TMGH][4-F-PhO].

**Disclaimer/Publisher's Note:** The statements, opinions and data contained in all publications are solely those of the individual author(s) and contributor(s) and not of MDPI and/or the editor(s). MDPI and/or the editor(s) disclaim responsibility for any injury to people or property resulting from any ideas, methods, instructions or products referred to in the content.
